# Supplementary material for: Asymmetric benzoylation and Henry reaction using reusable polytopic bis(oxazoline) ligands and copper(ii)
Source: Royal Society of Chemistry journal article supplement (doi:10.1039/c4nj00653d), 2014-01-01

## SUPPORTING INFORMATION

Maria Torres-Werlé,<sup>[a]</sup> Adela Nano,<sup>[a]</sup> Aline Maise-François,<sup>[a]</sup> Stéphane Bellemin-  
Laponnaz\*<sup>[a,b]</sup>

---

<sup>[a]</sup> Dr. M. Torres-Werlé, A. Nano, Dr. A. Maise-François, Dr. S. Bellemin-Laponnaz,  
Institut de Physique et Chimie des Matériaux de Strasbourg, Université de Strasbourg,  
CNRS UMR 7504, 23 rue du Loess, BP 43, F-67034 Strasbourg Cedex 2, France  
Fax: (+33) 388 107 246  
E-mail: bellemin@unistra.fr

<sup>[b]</sup> Dr. S. Bellemin-Laponnaz  
Institute for Advanced Study, Université de Strasbourg, France.

## General considerations

All manipulations (except catalytic runs) were performed under an inert atmosphere of argon or nitrogen using standard Schlenk line techniques. Valinol and phenylglycinol were obtained by reduction of Valine and Phenylglycine, respectively.<sup>[1]</sup> All other reagents were commercially available and used as received. Solvents were purified and degassed by standard procedures. Metal complexes were obtained using methanol as solvent (ACS reagent grade). <sup>1</sup>H and <sup>13</sup>C Nuclear Magnetic Resonance (NMR) spectra were recorded on a Bruker AVANCE 300 spectrometer using the residual solvent peak as reference (CDCl<sub>3</sub>: δ<sub>H</sub> = 7.26 ppm; δ<sub>C</sub> = 77.16 ppm) at 298K. Chemical shifts are given in ppm (δ) compared to TMS (tetramethylsilane). Infrared (IR) spectra were recorded on a Nicolet 380 FT-IR spectrometer. KBr discs were made for all samples. Elemental analyses were recorded by the 'Institut de Chimie' laboratory, Université de Strasbourg. HRMS ESI analyses were recorded on microTOF, Bruker Daltonics by the 'Institut de Chimie' laboratory, Université de Strasbourg. Specific rotations were recorded at the 'Laboratoire de Stéréochimie', ECPM, Strasbourg. HPLC analyses were performed on a Gilson apparatus (UV-VIS156/321 PUMP) with Chiralcel Daicel columns (AD, OD-H, AS, 0.46 X 25 cm) using *n*-Hexane/*i*-PrOH eluents. A dual wavelength UV detector was used. To confirm the retention times of both enantiomers, all racemic derivatives were prepared and injected on chiral HPLC. *i*Pr-DiBox (1), Ph-DiBox (2), *i*Pr-TriBox (3) and *i*Pr-TetraBox (4) have been prepared as previously reported.<sup>[2]</sup>

## Methods Used to Assay Enantiomeric Excess

### Conversions and ee determinations of the nitroaldolisation product

| Product                                                                             | ee assay                      | Conditions                                            | Retention time of enantiomer 1 (min) | Retention time of enantiomer 2 (min) | [α]<br>Solvent                         |
|-------------------------------------------------------------------------------------|-------------------------------|-------------------------------------------------------|--------------------------------------|--------------------------------------|----------------------------------------|
| 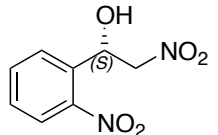 | HPLC<br>Chiralcel OD-H column | Hexane/ <i>i</i> PrOH<br>90/10<br>flow: 0.9<br>mL/min | 21.5                                 | 25.0<br>(major enantiomer)           | (-)<br>CH <sub>2</sub> Cl <sub>2</sub> |

For other ee assays, see :

a) D. A. Evans, D. Seidel, M. Rueping, H. W. Lam, J. T. Shaw, C. W. Downey, *J. Am. Chem. Soc.* **2003**, *125*, 12692.

- b) Y. Xiong, F. Wang, X. Huang, Y. Wen, X. Feng, *Chem. Eur. J.* **2007**, *13*, 829.
- c) M. Bandini, F. Piccinelli, S. Tommasi, A. Umami-Ronchi, C. Ventrici, *Chem. Commun.* **2007**, 616.
- d) I. Panov, P. Drabina, Z. Padelkova, P. Simunek, M. Sedlák, *J. Org. Chem.* **2011**, *76*, 4787.
- e) G. Lai, F. Guo, Y. Zheng, Y. Fang, H. Song, K. Xu, S. Wang, Z. Zha, Z. Wang, *Chem. Eur. J.* **2011**, *17*, 1114.

Conversions and ee determinations of the benzylation product

| Product                                                                                        | ee assay                      | Conditions                                          | Retention time of enantiomer 1 (min) | Retention time of enantiomer 2 (min) | [ $\alpha$ ] Solvent                   |
|------------------------------------------------------------------------------------------------|-------------------------------|-----------------------------------------------------|--------------------------------------|--------------------------------------|----------------------------------------|
| 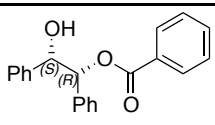<br>1(R),2(S) | HPLC<br>Chiracel AD<br>column | Hexane/ <i>i</i> PrOH<br>80/20<br>flow: 1<br>mL/min | 11.2                                 | 19.0<br>(major<br>enantiomer)        | (+)<br>CH <sub>2</sub> Cl <sub>2</sub> |

For other ee assays, see :

- a) Y. Matsumura, T. Maki, S. Murakami, O. Onomura, *J. Am. Chem. Soc.* **2003**, *125*, 2052
- b) D. Nakamura, K. Kakiuchi, K. Koga, R. Shirai, *Org. Lett.* **2006**, *8*, 6139.
- c) E. P. Kündig, A. E. Garcia, T. Lomberget, P. Perez Garcia, P. Romanens, *Chem. Commun.* **2008**, 3519

Conversions and ee determinations of the benzylation product and diol

| Product                                                                                        | ee assay                      | Conditions                                            | Retention time of enantiomer 1 (min) | Retention time of enantiomer 2 (min) | [ $\alpha$ ] Solvent     |
|------------------------------------------------------------------------------------------------|-------------------------------|-------------------------------------------------------|--------------------------------------|--------------------------------------|--------------------------|
| 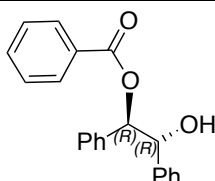<br>(1R,2R) | HPLC<br>Chiracel AS<br>column | Hexane/ <i>i</i> PrOH<br>85/15<br>flow: 0.9<br>mL/min | 11.1                                 | 14.5                                 | (+)<br>CHCl <sub>3</sub> |
| <br>(S,S)   | HPLC<br>Chiracel AS<br>column | Hexane/ <i>i</i> PrOH<br>85/15<br>flow: 0.9<br>mL/min | 9.6                                  | 12.5                                 | (+)<br>CHCl <sub>3</sub> |

For other ee assays, see :

- a) Y. Matsumura, T. Maki, S. Murakami, O. Onomura, *J. Am. Chem. Soc.* **2003**, *125*, 2052
- b) A. Gissibl, M. G. Finn, O. Reiser, *Org. Lett.* **2005**, *7*, 2325.
- c) C. Mazet, S. Roseblade, V. Köhler, A. Pfaltz, *Org. Lett.* **2006**, *8*, 1879.
- d) A. Schätz, R. N. Grass, Q. Kainz, W. J. Stark, O. Reiser, *Chem. Mater.* **2010**, *22*, 305.

### **Kinetic resolution of *rac*-hydrobenzoin**

Equations used to calculate the selectivity factor:

- $(ee \text{ of starting material}) / (ee \text{ of product}) = (\text{conversion}) / (1 - \text{conversion})$
- $s = (\ln[1 - \text{conversion}(1 + ee \text{ of product})]) / (\ln[1 - \text{conversion}(1 - ee \text{ of product})])$

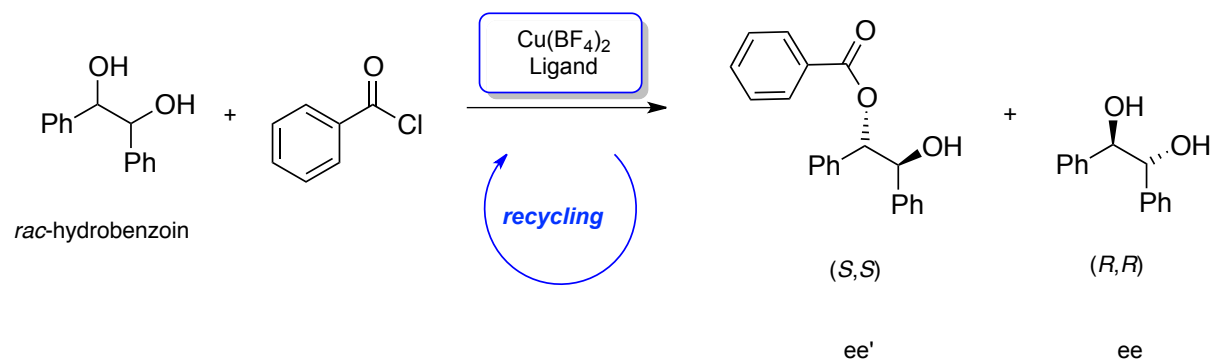

|                           | RUN                   | 1         | 2         | 3         | 4         | 5          | 6          |
|---------------------------|-----------------------|-----------|-----------|-----------|-----------|------------|------------|
| (S)- <i>i</i> Pr-DiBox    | conv <sub>(exp)</sub> | 49        | 50        | 48        | 50        | 45         | 16         |
|                           | ee                    | 92        | 86        | 79        | 85        | 59         | <10        |
|                           | ee'                   | 93        | 94        | 90        | 82        | 68         | 17         |
|                           | conv <sub>(th)</sub>  | 50        | 48        | 47        | 51        | 46         | 10         |
|                           | <b>s</b>              | <b>91</b> | <b>89</b> | <b>46</b> | <b>27</b> | <b>9.4</b> | <b>1.4</b> |
| (R)-Ph-DiBox              | conv <sub>(exp)</sub> | 49        | 54        | 51        | 53        | 50         | -          |
|                           | ee                    | 84        | 66        | 76        | 82        | 77         | -          |
|                           | ee'                   | 83        | 88        | 88        | 90        | 88         | -          |
|                           | conv <sub>(th)</sub>  | 50        | 43        | 46        | 48        | 47         | -          |
|                           | <b>s</b>              | <b>28</b> | <b>31</b> | <b>36</b> | <b>48</b> | <b>36</b>  | -          |
| (S)- <i>i</i> Pr-TriBox   | conv <sub>(exp)</sub> | 47        | 54        | 50        | 50        | -          | -          |
|                           | ee                    | 85        | 84        | 82        | 80        | -          | -          |
|                           | ee'                   | 94        | 67        | 84        | 93        | -          | -          |
|                           | conv <sub>(th)</sub>  | 47        | 45        | 49        | 46        | -          | -          |
|                           | <b>s</b>              | <b>88</b> | <b>37</b> | <b>29</b> | <b>49</b> | -          | -          |
| (S)- <i>i</i> Pr-TetraBox | conv <sub>(exp)</sub> | 45        | 57        | 50        | 44        | -          | -          |
|                           | ee                    | 72        | 81        | 71        | 80        | -          | -          |
|                           | ee'                   | 94        | 92        | 89        | 88        | -          | -          |
|                           | conv <sub>(th)</sub>  | 43        | 47        | 44        | 48        | -          | -          |
|                           | <b>s</b>              | <b>70</b> | <b>60</b> | <b>36</b> | <b>38</b> | -          | -          |

conv<sub>(exp)</sub> = conversion determined by <sup>1</sup>H NMR in the crude.

conv<sub>(th)</sub> = conversion determined from the enantiomeric excess of starting material and the enantiomeric excess of product.

[1] A. Abiko, S. Masamune, *Tetrahedron Lett.* **1992**, 33, 5517.

[2] M. Torres, A. Maise-Fançois, S. Bellemin-Laponnaz, *ChemCatChem* **2013**, 5, 3078.

|   | Inj. Number | R. Time | Area        | Area % | Sample Descrip. | Peak Name |
|---|-------------|---------|-------------|--------|-----------------|-----------|
| 1 | 1           | 11.31   | 29139932.00 | 87.72  | MT_546          | *3        |
| 2 | 1           | 19.21   | 4083272.25  | 12.28  | MT_546          | *4        |

Benzoylation of meso-hydrobenzoin  
 Table 1, Entry 2  
 Ligand (R,R) Ph-DiBox

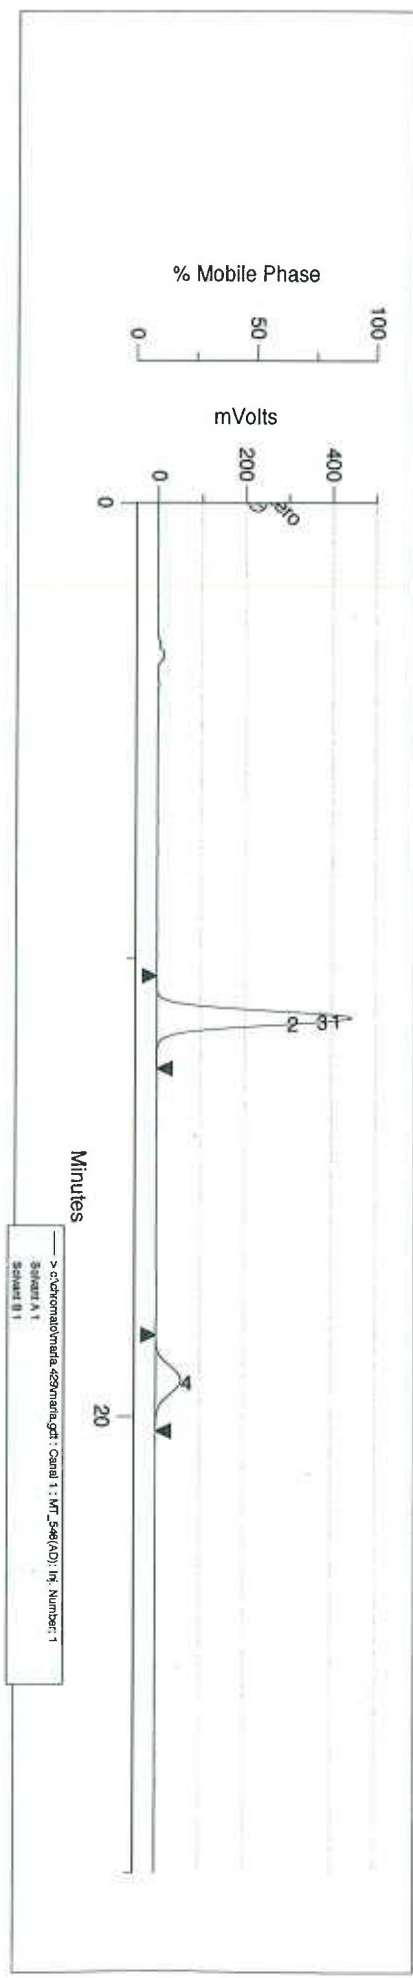

|   | Inj. Number | R. Time | Area        | Area % | Sample Descrip. | Peak Name |
|---|-------------|---------|-------------|--------|-----------------|-----------|
| 1 | 1           | 11.24   | 1180766.25  | 10.06  | MT_558          | *1        |
| 2 | 1           | 19.00   | 10556045.00 | 89.94  | MT_558          | *2        |

Benzoylation of meso-hydrobenzoin

Table 1, Entry 3

Ligand (S,S) iPr-DiBox

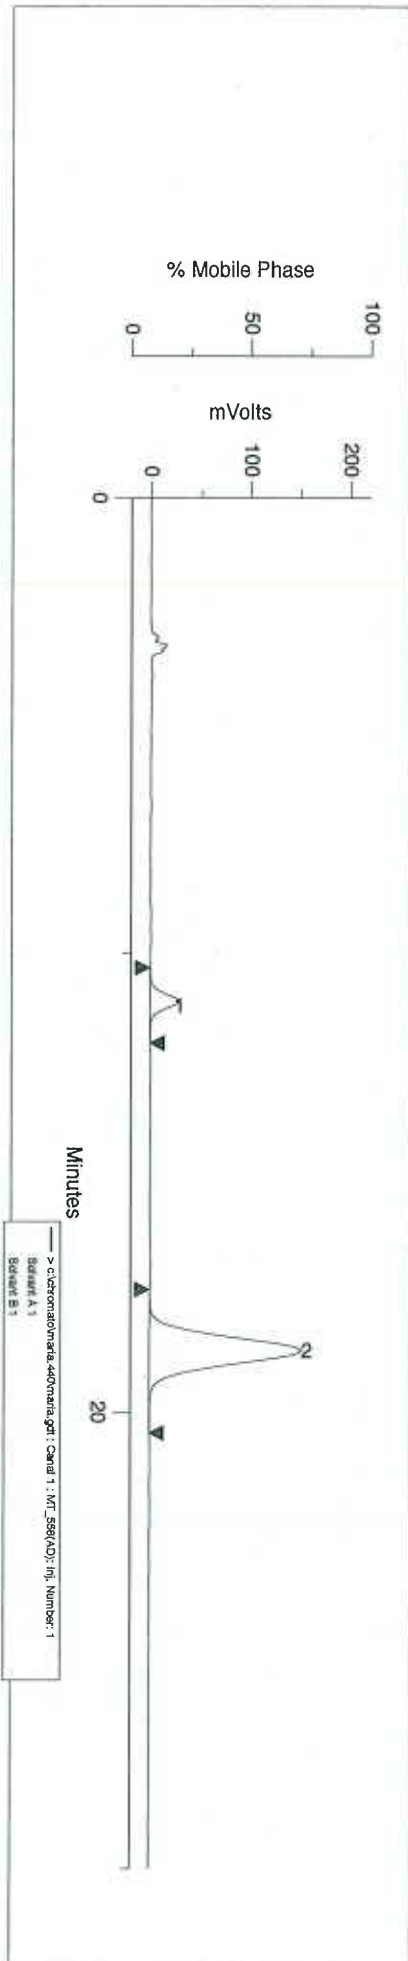

|   | Inj Number | R. Time | Area       | Area % | Sample Descrip. | Peak Name |
|---|------------|---------|------------|--------|-----------------|-----------|
| 1 | 1          | 11.07   | 2195412.25 | 25.32  | MT_561          | *1        |
| 2 | 1          | 18.70   | 6473653.00 | 74.68  | MT_561          | *2        |

Benzoylation of meso-hydrobenzoin  
 Table 2, Entry 1, Run 4  
 Ligand (S,S) iPr-DiBox

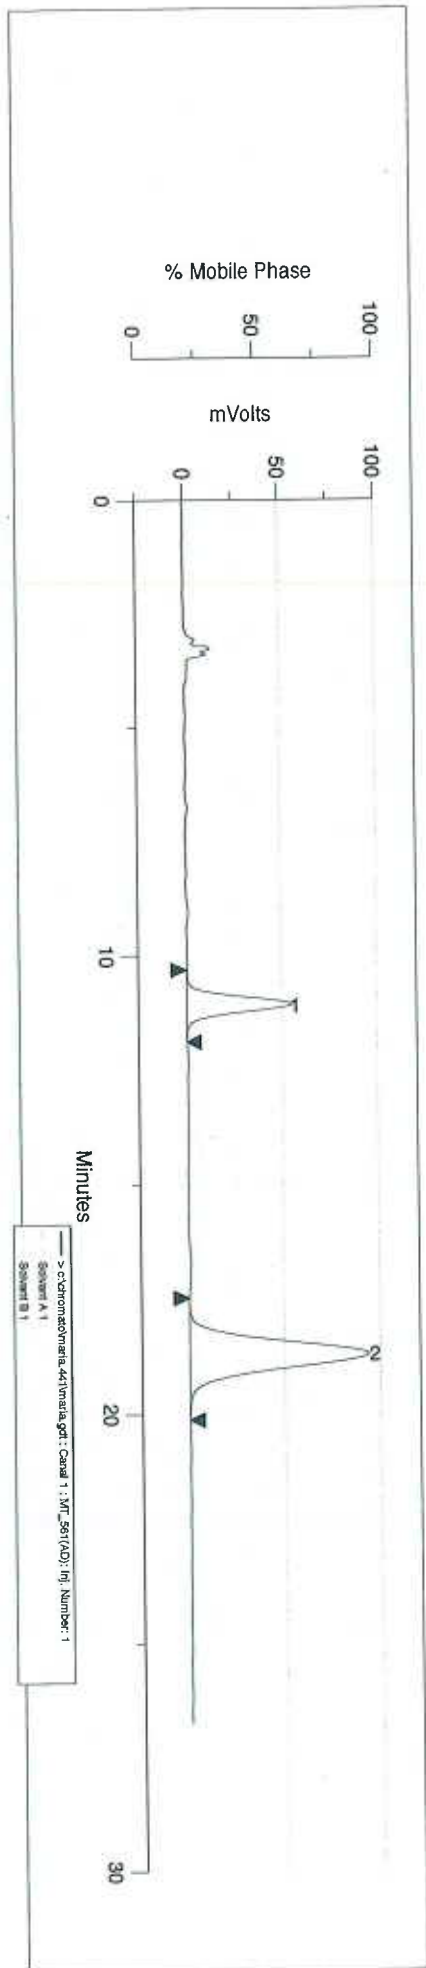



|   | Inj. Number | R. Time | Area        | Area % | Sample Descrip. | Peak Name |
|---|-------------|---------|-------------|--------|-----------------|-----------|
| 1 | 1           | 11.24   | 3465864.00  | 20.37  | MT_555          | *2        |
| 2 | 1           | 19.00   | 13546493.00 | 79.63  | MT_555          | *3        |

Benzoylation of meso-hydrobenzoin

Table 2, Entry 4, Run 4

Ligand (S,S) iPr-TetraBox

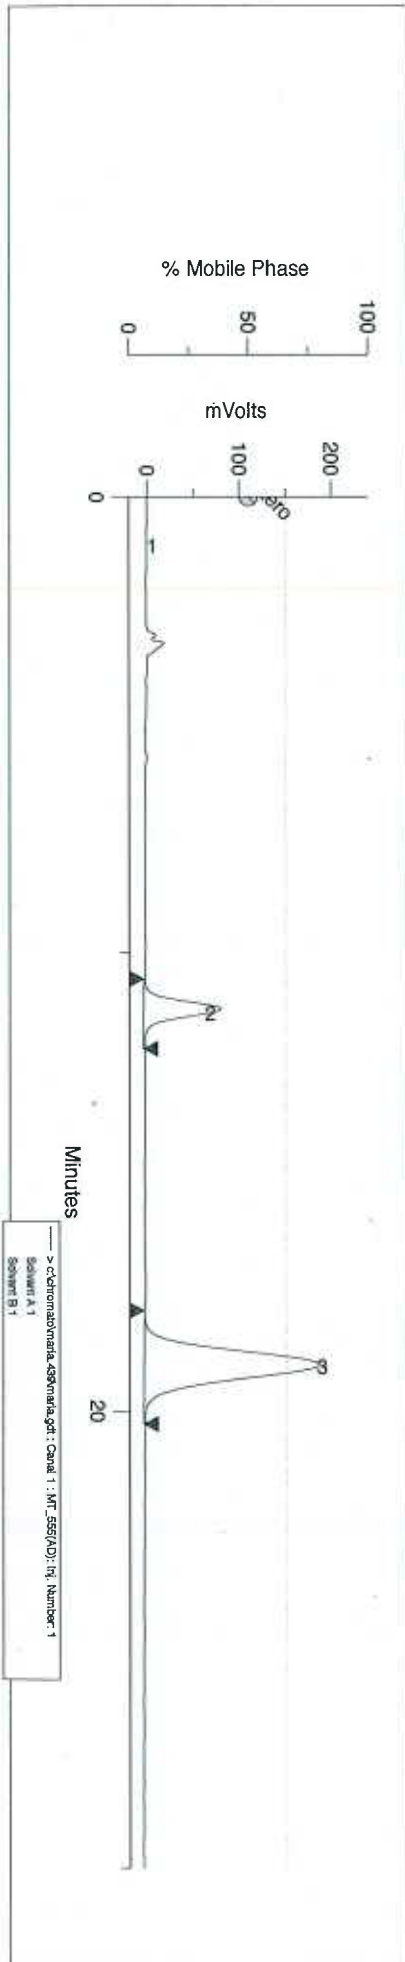

|   | Inj. Number | R. Time | Area        | Area % | Sample Descrip. | Peak Name |
|---|-------------|---------|-------------|--------|-----------------|-----------|
| 1 | 1           | 9.60    | 971901.81   | 3.47   | MT_582          | *1        |
| 2 | 1           | 11.08   | 995889.38   | 3.55   | MT_582          | *2        |
| 3 | 1           | 12.55   | 8640794.00  | 30.84  | MT_582          | *3        |
| 4 | 1           | 14.31   | 17411008.00 | 62.14  | MT_582          | *4        |

Kinetic Resolution of rac-hydrobenzoin

Peak 1 and 3: hydrobenzoin

Peak 2 and 4: product

Table 3, ligand (S,S) iPr-DiBox, run 3

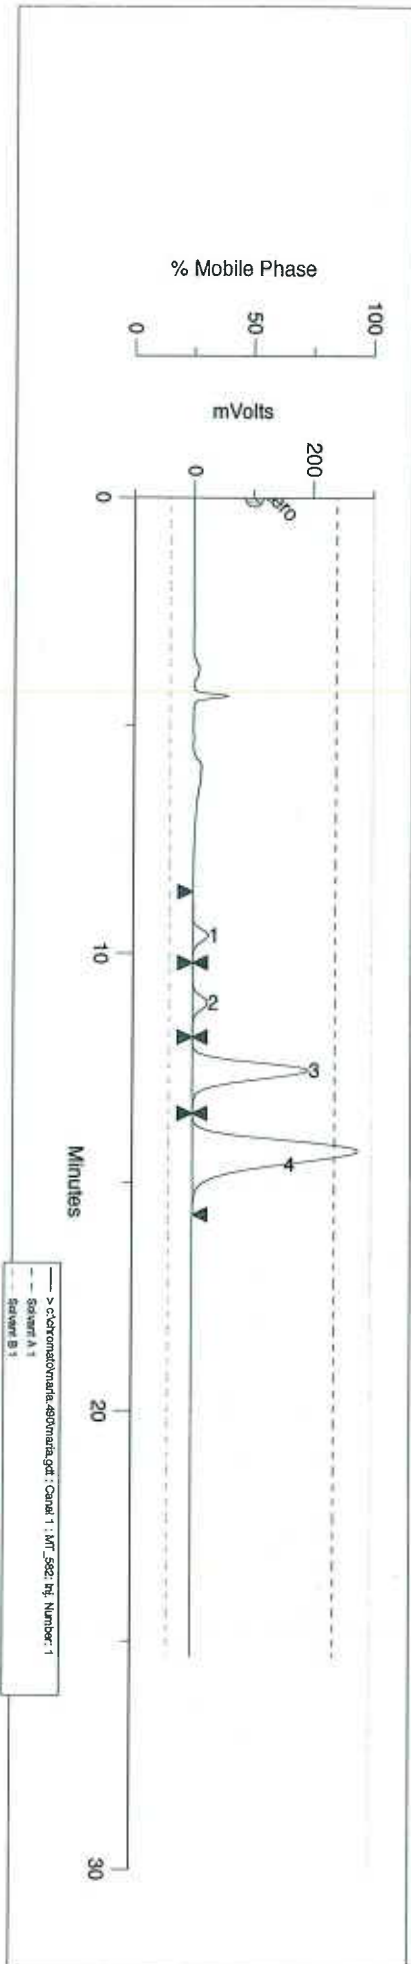

|   | Inj. Number | R. Time | Area        | Area % | Sample Descrip. | Peak Name         |
|---|-------------|---------|-------------|--------|-----------------|-------------------|
| 1 | 1           | 9.85    | 23364804.00 | 47.66  | MT_581          | *1                |
| 2 | 1           | 11.12   | 21458248.00 | 43.77  | MT_581          | *5 <sup>ref</sup> |
| 3 | 1           | 12.66   | 2152407.25  | 4.39   | MT_581          | *7                |
| 4 | 1           | 14.52   | 2046736.12  | 4.18   | MT_581          | *9                |

Kinetic Resolution of rac-hydrobenzoin

Peak 1 and 3: hydrobenzoin

Peak 2 and 4: product

Table 3, ligand (R,R) Ph-DiBox, run 1

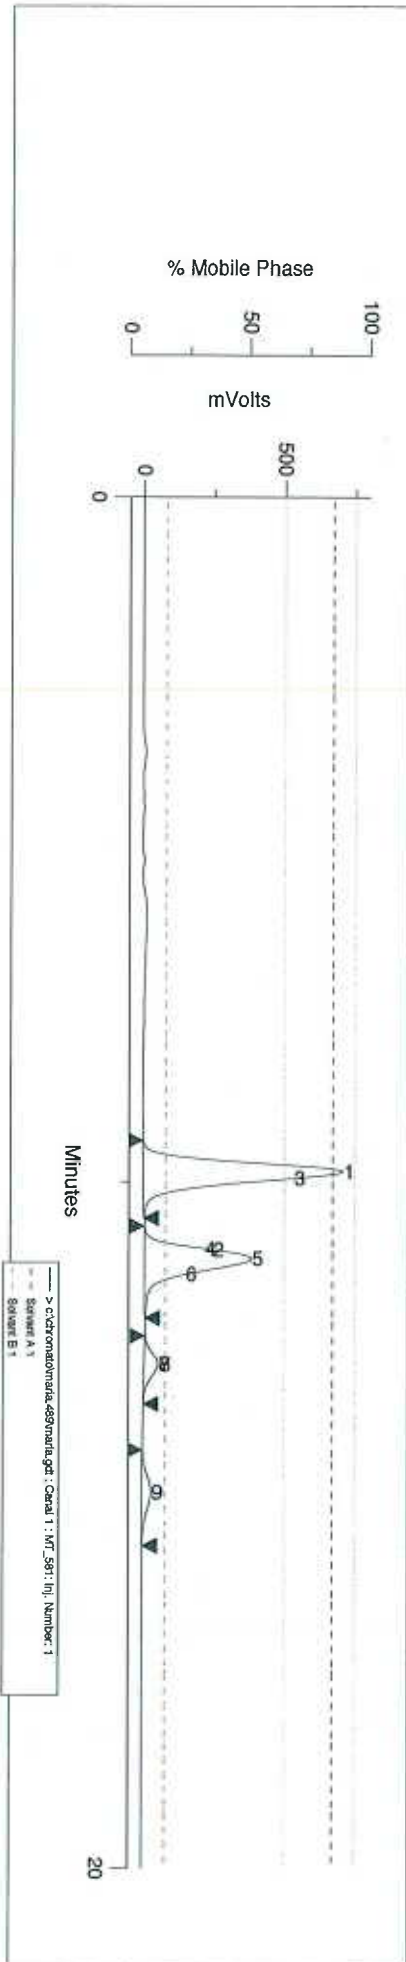

|   | Inj. Number | R. Time | Area        | Area % | Sample Descrip. | Peak Name |
|---|-------------|---------|-------------|--------|-----------------|-----------|
| 1 | 1           | 20.88   | 14759151.00 | 68.15  | MT_247          | *1        |
| 2 | 1           | 24.45   | 6898212.50  | 31.85  | MT_247          | *2        |

Henry reaction  
 Table 4, Entry 4  
 Ligand (R,R) Ph-Dibox

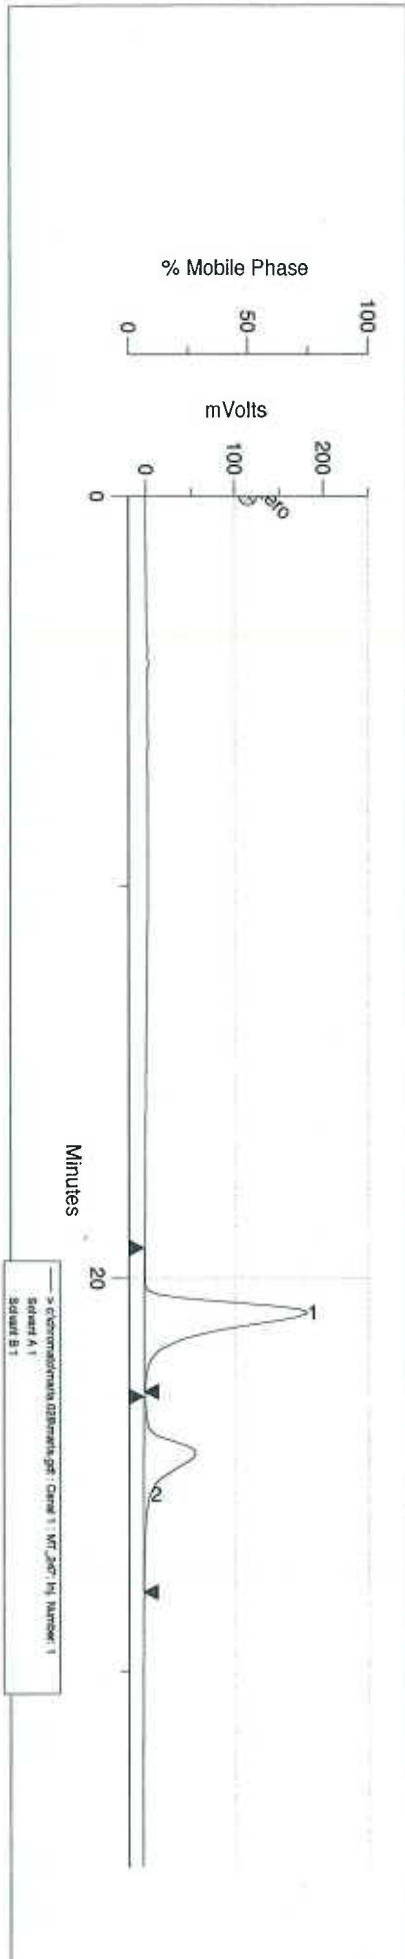

|   | Inj. Number | R. Time | Area       | Area % | Sample Descrip. | Peak Name |
|---|-------------|---------|------------|--------|-----------------|-----------|
| 1 | 1           | 20.93   | 4997235.00 | 82.89  | MT_254          | *1        |
| 2 | 1           | 24.51   | 1031672.56 | 17.11  | MT_254          | *2        |

Henry reaction  
 Table 4, Entry 5  
 Ligand (R,R) iPrBox

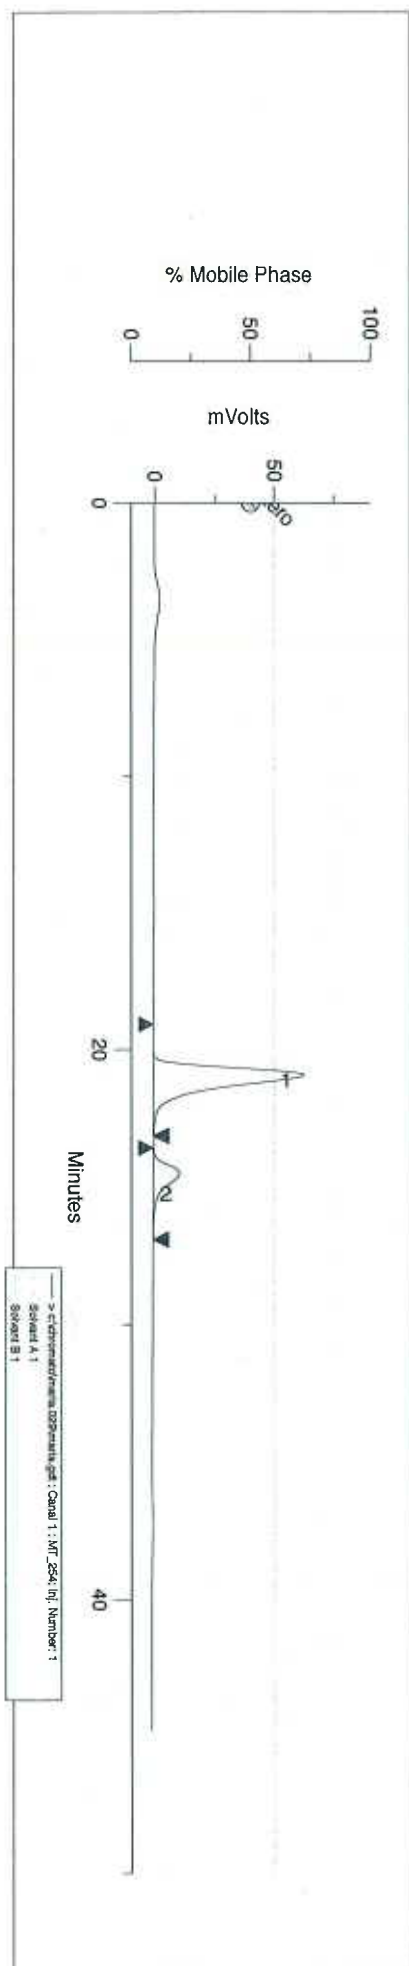

|   | Inj. Number | R. Time | Area        | Area % | Sample Descrip. | Peak Name |
|---|-------------|---------|-------------|--------|-----------------|-----------|
| 1 | 1           | 19.15   | 3943539.75  | 10.50  | MT_112a         | *1        |
| 2 | 1           | 21.27   | 33613981.00 | 89.50  | MT_112a         | *2        |

Henry reaction  
 Table 6, Run 1  
 Ligand (S,S) iPr-TetraBox

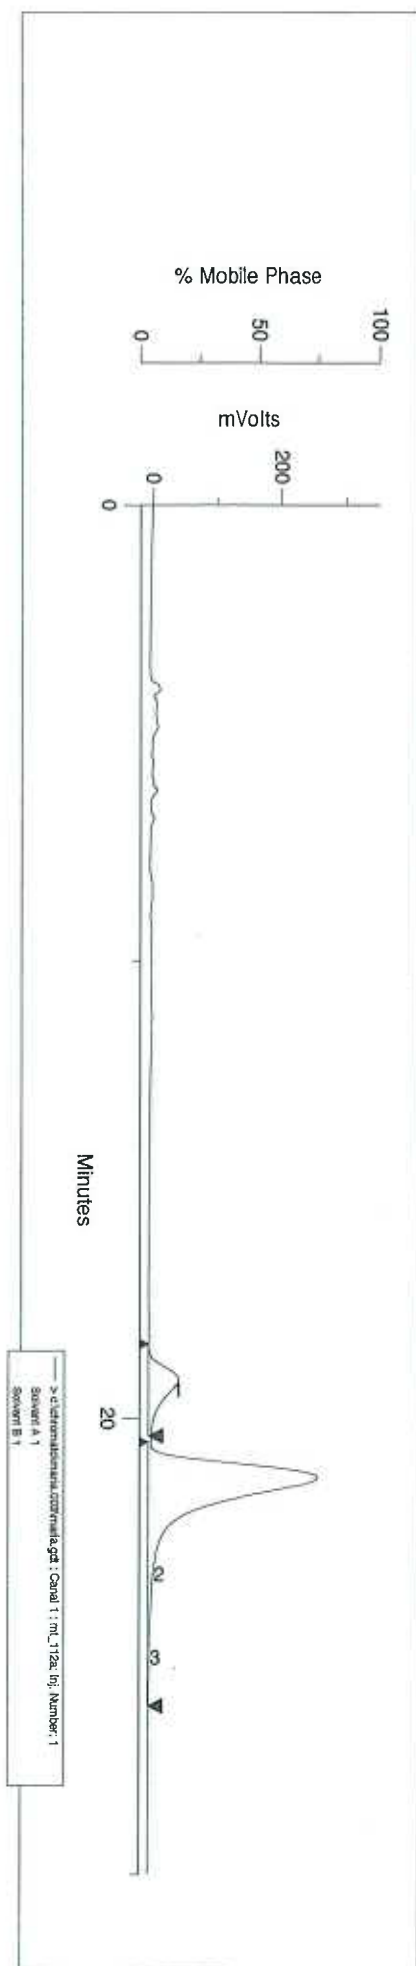

|   | Inj Number | R. Time | Area       | Area % | Sample Descrip | Peak Name |
|---|------------|---------|------------|--------|----------------|-----------|
| 1 | 1          | 21.41   | 261480.28  | 12.92  | MT_210         | *1        |
| 2 | 1          | 25.08   | 1763111.00 | 87.08  | MT_210         | *2        |

Henry reaction  
Table 6, Run 3  
Ligand (S,S) iPr-TetraBox

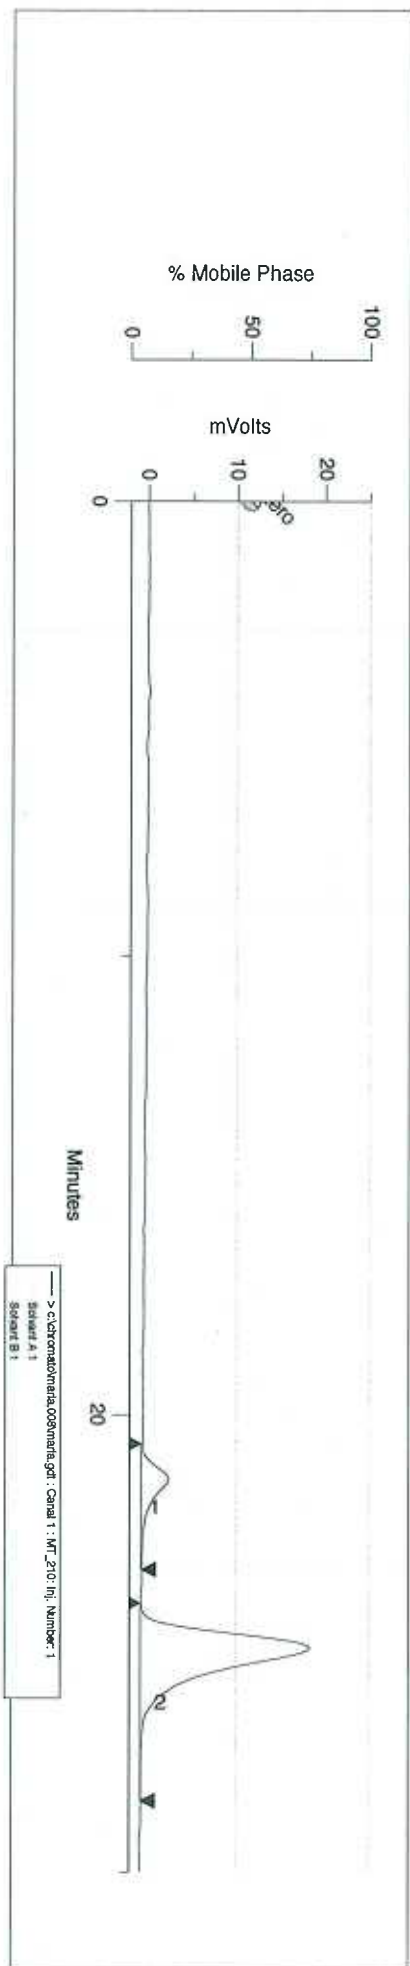

|   | Inj. Number | R. Time | Area       | Area % | Sample Descrip. | Peak Name |
|---|-------------|---------|------------|--------|-----------------|-----------|
| 1 | 1           | 21.77   | 865356.31  | 16.67  | MT_217          | *1        |
| 2 | 1           | 25.50   | 4328085.00 | 83.33  | MT_217          | *2        |

Henry reaction  
Table 6, Run 5

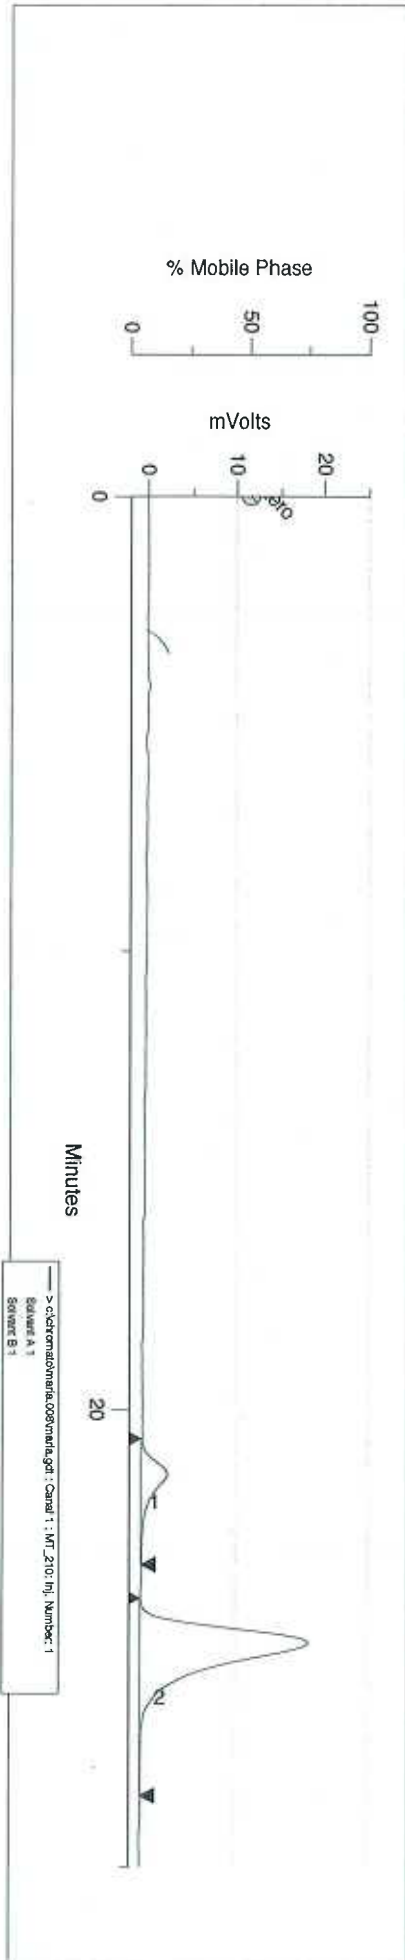

Supplement: c4nj00653d1.pdf [file c4nj00653d1.pdf]
